# Supplementary material for: The Spodoptera exigua ABCC2 Acts as a Cry1A Receptor Independently of its Nucleotide Binding Domain II
Source: Toxins (Basel). 2019 Mar 22;11(3):172. doi: 10.3390/toxins11030172 (PMC6468857; doi:10.3390/toxins11030172)
Supplement: Supplementary file 1 [file toxins-11-00172-s001.pdf]

# Supplementary Materials: The *Spodoptera exigua* ABCC2 Acts as a Cry1A Receptor Independently of its Nucleotide Binding Domain II

Daniel Pinos, María Martínez-Solís, Salvador Herrero, Juan Ferré and Patricia Hernández-Martínez

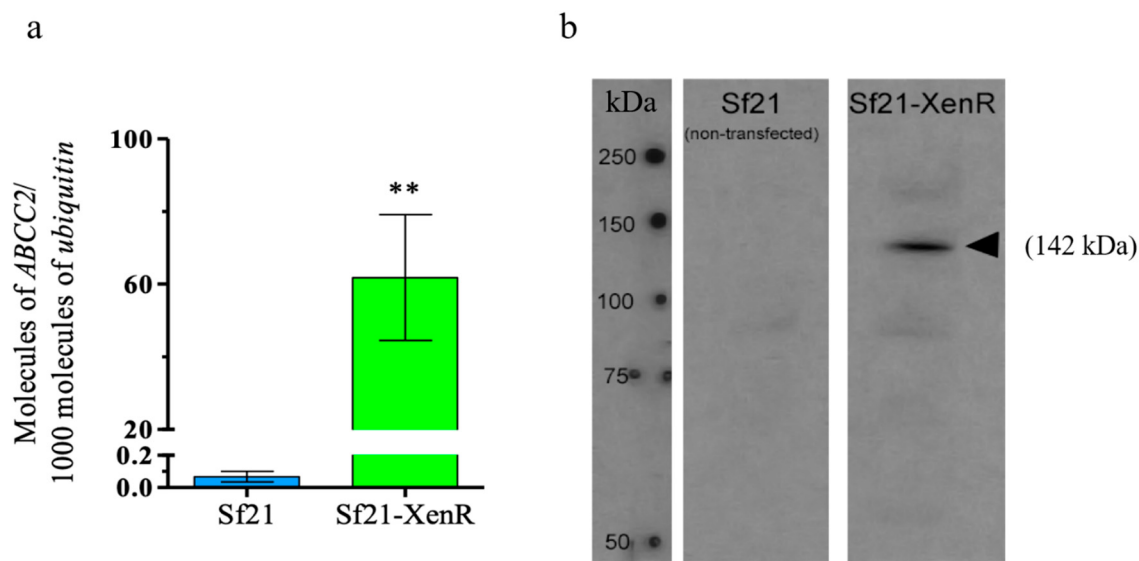

**Figure S1.** Detection of the truncated ABCC2 **(a)** Expression levels measured by RT-qPCR in Sf21 and Sf21-XenR insect cell lines. The *ubiquitin* gene was used as housekeeping gene. The gene expression is given as copy number per 1000 molecules ubiquitin  $\pm$  SEM. Means were compared by T-test ( $p < 0.01$ ). Significant differences are indicated by asterisks. **(b)** Western blot analysis showing the presence of the truncated SeABCC2 transporter (black arrow, *ca.* 142 kDa) in the membrane vesicles of Sf21 and Sf21-XenR cells. First line, molecular mass marker (in kDa).

**Table S1.** Sequence of the primers used in this study.

| Primer name                    | Sequence (5'–3')                                       |
|--------------------------------|--------------------------------------------------------|
| <i>Cloning</i>                 |                                                        |
| SeABCC2_SacI <sup>F</sup>      | CGAGCTCATGGACAAATCGAATAAA                              |
| SeABCC2_FLAG/XbaI <sup>R</sup> | GTCTAGACTACTTGTCGTCATCGTCTTTGTAGTCAGCGGTTTTGGAATCACTTT |
| <i>qRT-PCR</i>                 |                                                        |
| qF_SeABCC2                     | AGCTACCGACCGAGGAAAAT                                   |
| qR_SeABCC2                     | CTCTCCAGCACTAGGCCATC                                   |
| qF-ubiquitin                   | GTTGCTGGTCTGGTGGGATT                                   |
| qR-ubiquitin                   | AGGCCTCAGACACCATTGAAA                                  |
